# Supplementary material for: Spred2-deficiency enhances the proliferation of lung epithelial cells and alleviates pulmonary fibrosis induced by bleomycin
Source: PubMed Central journal article supplement (PMC7536438; doi:10.1038/s41598-020-73752-3), 2020-10-05
Supplement: 41598_2020_73752_MOESM1_ESM.pdf [file 41598_2020_73752_MOESM1_ESM.pdf]

# Supplementary Figures

## Spred2-Deficiency Enhances the Proliferation of Lung Epithelial Cells and Alleviates Pulmonary Fibrosis Induced by Bleomycin

Akina Kawara<sup>1</sup>, Ryo Mizuta<sup>1</sup>, Masayoshi Fujisawa<sup>1</sup>, Toshihiro Ito<sup>2</sup>, Chunling Li<sup>1</sup>, Kaoru Nakamura<sup>1</sup>, Cuiming Sun<sup>1</sup>, Masaki Kuwabara<sup>1</sup>, Masahiro Kitabatake<sup>2</sup>, Teizo Yoshimura<sup>1</sup> & Akihiro Matsukawa<sup>1</sup>

<sup>1</sup> Department of Pathology and Experimental Medicine, Graduated School of Medicine, Dentistry and Pharmaceutical Sciences, Okayama University, 2-5-1 Shikata, Kita-ku, Okayama, 700-8558, Japan.

<sup>2</sup> Department of Immunology, Nara Medical University, Kashihara, 634-8521, Japan.

WT, untreated

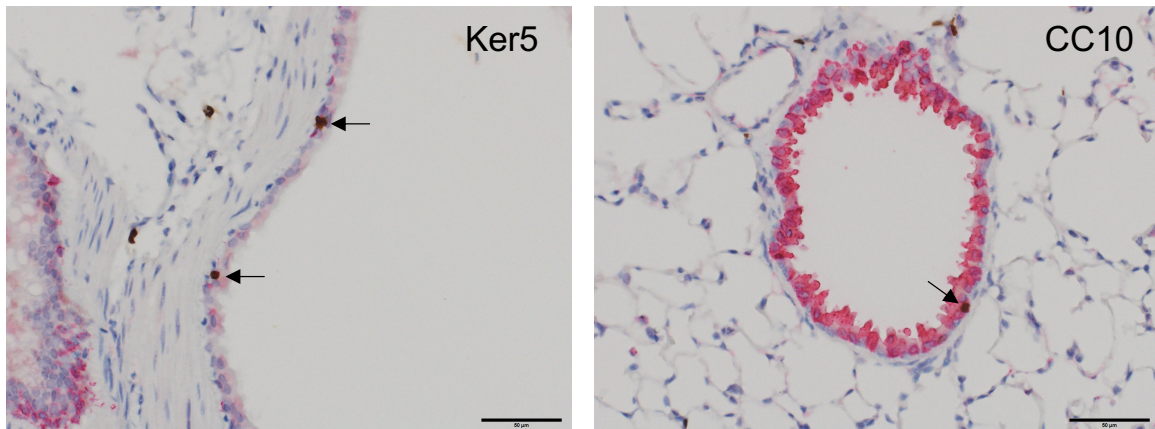

Spred2<sup>-/-</sup>, untreated

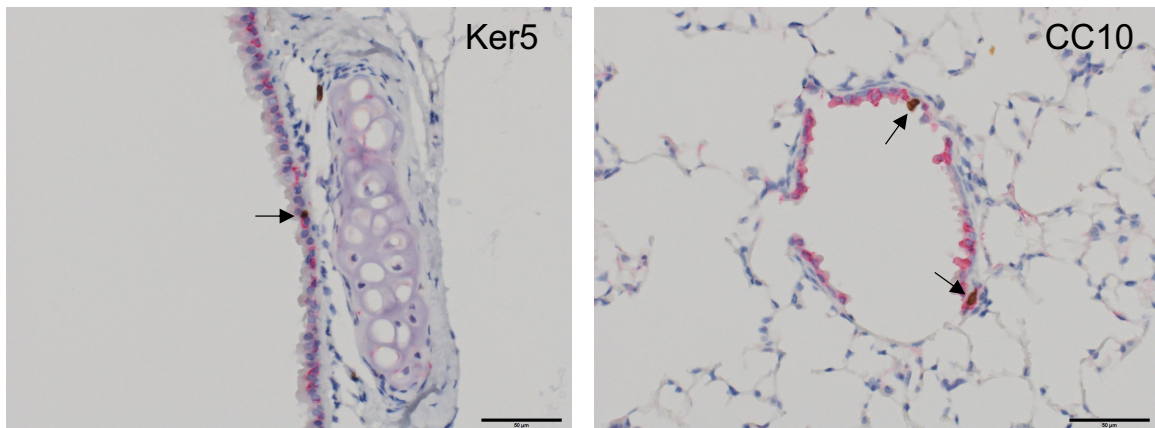

**Supplementary Figure S1.** Incorporation of BrdU by Keratin 5- and CC10-positive bronchial epithelial cells of untreated WT and *spred2*<sup>-/-</sup> mice. Paraffin sections of lungs from WT or *Spred2*<sup>-/-</sup> mice were double stained for BrdU and Keratin 5 or CC10 as described in the M&M section. Arrows indicate double positive cells. Scale bars are 50 µm.

**a**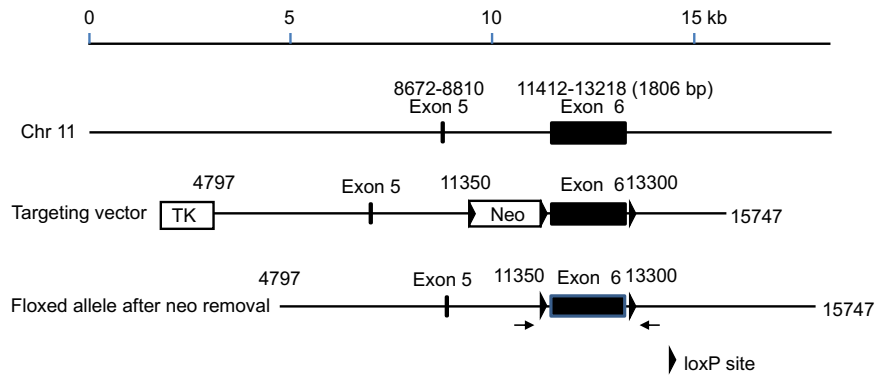**b**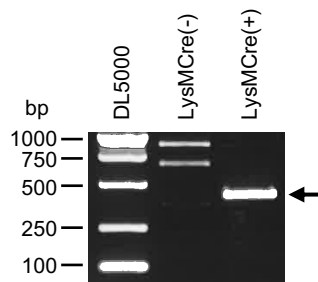**Supplementary Figure S2. Generation of myeloid cell-specific *Spred2*-deficient mice.**

**a.** To generate *Spred2*<sup>fl<sub>ox</sub>/fl<sub>ox</sub></sup> mice, an approximately 11-kb fragment of mouse genomic DNA spanning the exon 5 and 6 of the *Spred2* gene was retrieved from a mouse BAC clone into pLMJ235 vector containing the thymidine kinase gene. A loxP site was inserted upstream of exon 6 and a neo gene cassette flanked by loxP-FRT was inserted downstream of exon 6 by using a recombinogenic cloning method. The targeting vector was then electroporated into C57BL/6 mouse ES cells and *Spred2* flox-neo mice were generated. To generate *Spred2* floxed mice (*Spred2*<sup>F/F</sup>), *Spred2* flox-neo mice were crossed to CAG-Flpe mice on a C57BL/6 background (RIKEN Bioresource Center, Tsukuba, Japan). Heterozygous mice (*Spred2*<sup>F/+</sup>) were mated to generate homozygous *Spred2* floxed mice (*Spred2*<sup>F/F</sup>). Two arrows indicate the locations of 2 primers used to detect the knockout allele. **b.** *Spred2*<sup>F/F</sup> mice were crossed to LysMCre on a C57BL/6 genetic background to generate myeloid cell-specific *Spred2*<sup>-/-</sup> mice. The presence of the knockout allele in the bone marrow cells of LysMCre<sup>+</sup>*Spred2*<sup>F/F</sup> mice was confirmed by PCR. The 400-bp band (arrow) indicates the knockout allele.

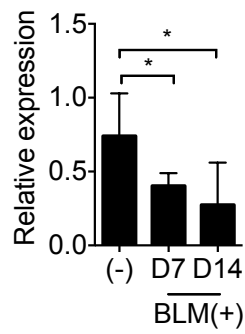

**Supplementary Figure S3.** Downregulation of Spred2 mRNA expression in the lung of WT mice after administration of BLM. Lungs were obtained from untreated and BLM (1.5 mg/kg)-treated WT mice on Day 7 and 14, and the levels of Spred2 mRNA were examined by RT-qPCR. The results are presented as mean  $\pm$  SD.  $n = 3$  (for untreated), 8 (for Day 7) and 7 (for Day 14).  $*p < 0.05$ .
