# Supplementary material for: Spred2-deficiency enhances the proliferation of lung epithelial cells and alleviates pulmonary fibrosis induced by bleomycin
Source: PubMed Central journal article supplement (PMC7536438; doi:10.1038/s41598-020-73752-3), 2020-10-05
Supplement: 41598_2020_73752_MOESM2_ESM.pdf [file 41598_2020_73752_MOESM2_ESM.pdf]

Supplementary Information (Original photos used for Figure 6)

Spred2-Deficiency Enhances the Proliferation of Lung Epithelial Cells and Alleviates Pulmonary Fibrosis  
Induced by Bleomycin

Akina Kawara<sup>1</sup>, Ryo Mizuta<sup>1</sup>, Masayoshi Fujisawa<sup>1</sup>, Toshihiro Ito<sup>2</sup>, Chunling Li<sup>1</sup>, Kaoru Nakamura<sup>1</sup>, Cuiming Sun<sup>1</sup>, Masaki Kuwabara<sup>1</sup>, Masahiro Kitabatake<sup>2</sup>, Teizo Yoshimura<sup>1</sup> & Akihiro Matsukawa<sup>1</sup>

<sup>1</sup> Department of Pathology and Experimental Medicine, Graduated School of Medicine, Dentistry and Pharmaceutical Sciences, Okayama University, 2-5-1 Shikata, Kita-ku, Okayama, 700-8558, Japan.

<sup>2</sup> Department of Immunology, Nara Medical University, Kashihara, 634-8521, Japan.

Figure 6a

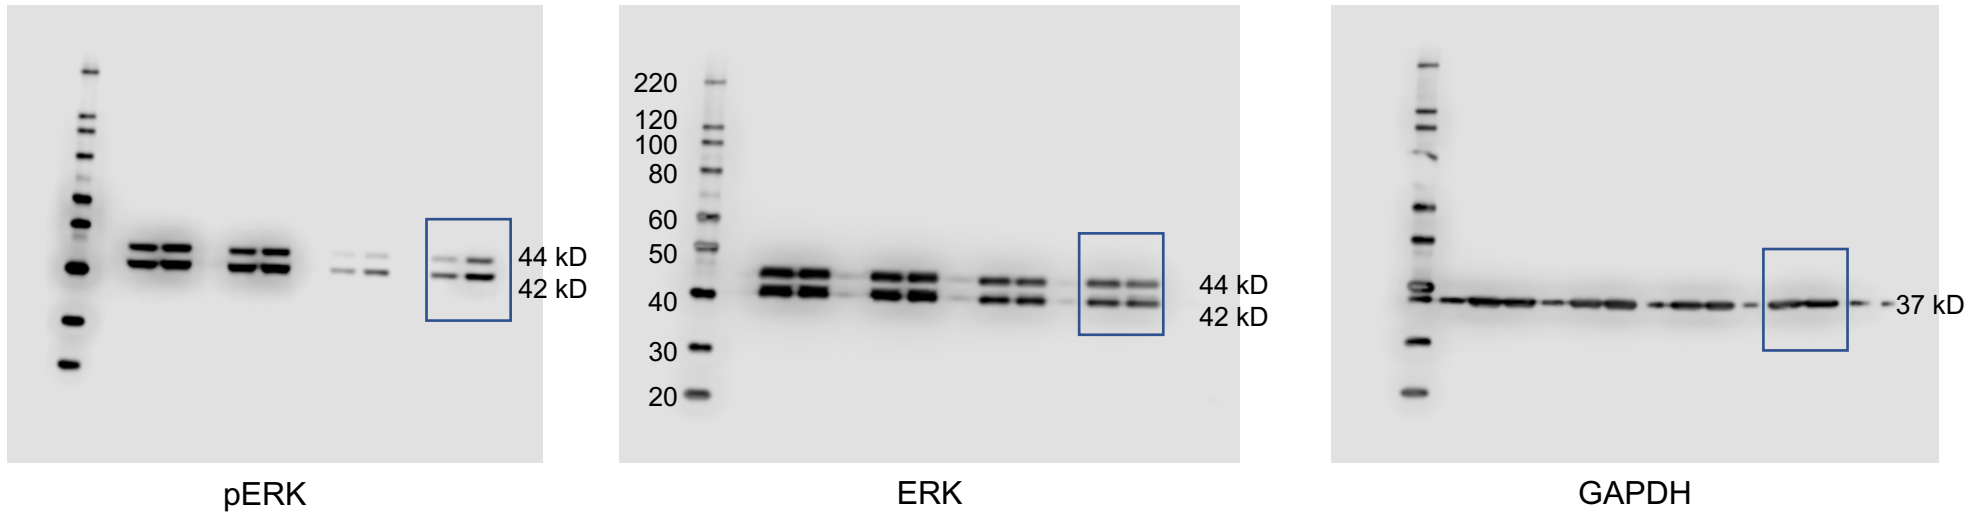

Figure 6b

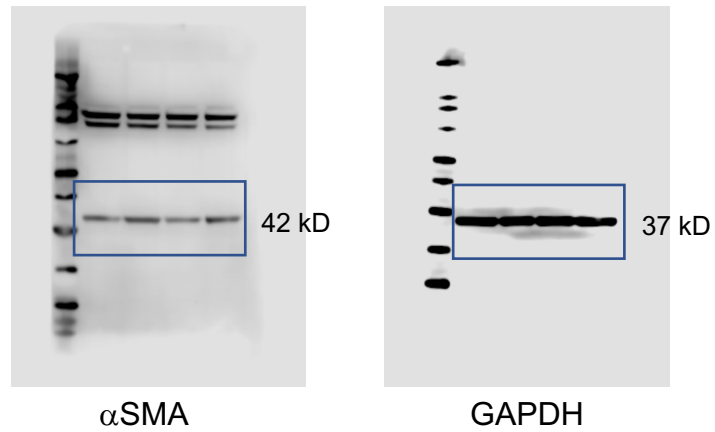

The MagicMark XP (Thermofisher) was used as a M.W. marker.
